# Supplementary material
Source: publisher figshare collection journal article supplement (https://tandf.figshare.com/ndownloader/files/13426946)
Supplement: Supplementary file 1 [file 13426946]

**Preparation, characterization of RDX/GAP nanocomposites and study on the thermal decomposition behavior**

**Teng Chena, Bingwang Goub, GaZi Haoa, Han Gaoa, Lei Xiaoa, Xiang Kea, Shuangfeng Guob[[1]](#footnote-1)*,Wei Jianga[[2]](#footnote-2)***

a National Special Superfine Powder Engineering Research Center of China, School of Chemical Engineering, Nanjing University of Science and Technology, Nanjing, 210094, P R China

b Xi’an Modern Chemistry Research Institute, Shaanxi, 710065, P R China





Fig.S1 DTA curves of GAP and RDX mixture at different heating rates.

1. *Corresponding author. Tel.: +86-29-88291798; fax: +86-29-88291798. E-mail address: gsf588325@163.com, (S. F. Guo) [↑](#footnote-ref-1)
2. *Corresponding author. Tel.: +86-25-84315042; fax: +86-25-84315042. E-mail address: [superfine_jw@126.com](mailto:superfine_jw@126.com), (W. Jiang) [↑](#footnote-ref-2)
